# Supplementary material
Source: PubMed Central journal article supplement (PMC3648121)
Supplement: JVI.03390-12_zjv999097685so1.pdf [file JVI.03390-12_zjv999097685so1.pdf]

|              |                                                                        |    |                        |
|--------------|------------------------------------------------------------------------|----|------------------------|
| TVCV OSU     | MSIVSYEPKVSDFLNLSSKKEEILPKALTRLKTVISISTKDIISVKESSETLCDIDLLINVPLDKYRYVG | 67 | <a href="#">Q88921</a> |
| NZ-587       | MSIVSYEPKVSDFLNLSSKKEEILPKALTRLKTVISISTKDIISVKESSETLCDIDLLINVPLDKYRYVG | 67 | <a href="#">I6NG32</a> |
| NZ-438       | MSIVSYEPKVSDFLNLSSKKEEILPKALTRLKTVISISTKDIISVKESSETLCDIDLLINVPLDKYRYVG | 67 | <a href="#">I6NH32</a> |
| Pet-MS       | MSIVSYEPKVSDFLNLSSKKEEILPKALTRLKTVISISTKDIISVKESSETLCDIDLLINVPLDKYRYVG | 67 | <a href="#">B1A0S9</a> |
| D/A          | MSIVSYEPKVSDFLNLSSKKEEILPKALTRLKTVISISTKDIISVKESSETLCDIDLLINVPLDKYRYVG | 67 | <a href="#">Q88605</a> |
| YoMV (ORMV)  | ---MSYEPKVSDFLALTTKKEEILPKALTRLKTVISISTKDVISVKESSESLCDIDLLVNVPDLKYRYVG | 64 | <a href="#">Q66221</a> |
| Shanxi       | ---MSYEPKVSDFLALTTKKEEILPKALTRLKTVISISTKDVISVKESSESLCDIDLLVNVPDLKYRYVG | 64 | <a href="#">H6X0P4</a> |
| Br           | ---MSYEPKVSDFLALTTKKEEILPKALTRLKTVISISTKDVISVKESSESLCDIDLLVNVPDLKYRYVG | 64 | <a href="#">G9IAP7</a> |
| R/W          | ---MSYEPKVSDFLALTTKKEEILPKALTRLKTVISISTKDVISVKESSESLCDIDLLVNVPDLKYRYVG | 64 | <a href="#">Q7TD01</a> |
| Shanghai     | ---MSYEPKVSDFLALTTKKEEILPKALTRLKTVISISTKDVISVKESSESLCDIDLLVNVPDLKYRYVG | 64 | <a href="#">Q91PA6</a> |
| 722          | ---MSYEPKVSDFLALTTKKEEILPKALTRLKTVISISTKDVISVKESSESLCDIDLLVNVPDLKYRYVG | 64 | <a href="#">A0AP61</a> |
| Wh           | ---MSYEPKVSDFLALTTKKEEILPKALTRLKTVISISTKDVISVKESSESLCDIDLLVNVPDLKYRYVG | 64 | <a href="#">B2LS15</a> |
| RMV (Zhu/Yu) | ---MSYEPKVSDFLALTTKKEEILPKALTRLKTVISISTKDVISVKESSESLCDIDLLVNVPDLKYRYVG | 64 | <a href="#">Q9QD18</a> |
| Kons.1105    | MSMVSYPEKVNDFLFTLNKEKILPKALTRLKTVISISTKDIISVKESSETLCDIDLLIDVPLDKYRYVG  | 67 | <a href="#">F8SRF8</a> |
| Act.-AC/AD   | MSMVSYPEKVNDFLFTLNKEKILPKALTRLKTVISISTKDIISVKESSETLCDIDLLIDVPLDKYRYVG  | 67 | <a href="#">E0WXS9</a> |
| FSHS         | MSMVSYPEKVNDFLFTLNKEKILPKALTRLKTVISISTKDVISVKESSETLCDIDLLIDVPLDKYRYVG  | 67 | <a href="#">I7A7B2</a> |
| NZ-439       | MSMVSYPEKVNDFLFTLNKEKILPKALTRLKTVISISTKDIISVKESSETLCDIDLLIDVPLDKYRYVG  | 67 | <a href="#">F8SRF4</a> |
|              | :*****.***.*:*..*****.*.....*:***.*:*****.*:*****.*                    |    |                        |

|              |                                                                       |     |
|--------------|-----------------------------------------------------------------------|-----|
| TVCV OSU     | ILGAVFTGEWLVPDFVKGGVTISVIDKRLVNSKECVIGTYRAAAAKSKRFQFKLVPNYFVSTVDADAKR | 134 |
| NZ-587       | ILGAVFTGEWLVPDFVKGGVTISVIDKRLVNSKECVIGTYRAAAAKSKRFQFKLVPNYFVSTADAKR   | 134 |
| NZ-438       | ILGAVFTGEWLVPDFVKGGVTISVIDKRLVNSKECVIGTYRAAAAKSKRFQFKLVPNYFVSTADAKR   | 134 |
| Pet-MS       | ILGAVFTGEWLVPDFVKGGVTISVIDKRLVNSKECVIGTYRAAAAKSKRFQFKLVPNYFVSTVDADAKR | 134 |
| D/A          | ILGAVFTGEWLVPDFVKGGVTISVIDKRLANSKECVIGTYRAAAAKSKRFQFKLVPNYFVSTVDADAKR | 134 |
| YoMV (ORMV)  | VLGVVFTGEWLVPDFVKGGVTVSVIDKRLSNSKECI GITYRAAAKDRRFQFKLVPNYFVSVADAKR   | 131 |
| Shanxi       | VLGVVFTGEWLVPDFVKGGVTVSVIDKRLSNSKECI IGTYRAAAKDRRFQFKLVPNYFVSVADAKR   | 131 |
| Br           | VLGVVFTGEWLVPDFVKGGVTVSVIDKRLSNSRECI IGTYRAAAKDRRFQFKLVPNYFVSVADAKR   | 131 |
| R/W          | VLGVVFTGEWLVPDFVKGGVTVSVIDKRLSNSRECI IGTYRAAAKDRRFQFKLVPNYFVSTADAKR   | 131 |
| Shanghai     | VLGVAFTEGWLPDFVKGGVTVSVIDKRLSNSRESMIGTYRAAAKDRRFQFKLVPNYFVSTADAKR     | 131 |
| 722          | VLGVVFTGEWLVPDFVKGGVTVSVIDKRLSNSKECI IGTYRAAAKDRRFQFKLVPNYFVSVADAKR   | 131 |
| Wh           | VLGVVFTGEWLVPDFVKGGVTVSVIDKRLSNSKECI IGTYRAAAKDRRFQFKLVPNYFVSVADAKR   | 131 |
| RMV (Zhu/Yu) | VLGVAFTEGWLPDFVKGGVTVSVIDKRLSNSRESMIGTYRAAAKDRRFQFKLVPNYFVSTADAKR     | 131 |
| Kons.1105    | ILGAVFTGEWLVPDFVKGGVTISVIDKRLVNSKECVIGTYRAAAAKSKRFQFKLVPNYFVSTADAKR   | 134 |
| Act.-AC/AD   | ILGAVFTGEWLVPDFVKGGVTISVIDKRLVNSKECVIGTYRAAAAKSKRFQFKLVPNYFVSTADAKR   | 134 |
| FSHS         | ILGAVFTGEWLVPDFVKGGVTISVIDKRLVNSKECVIGTYRAAAAKSKRFQFKLVPNYFVSTADAKR   | 134 |
| NZ-439       | ILGAVFTGEWLVPDFVKGGVTISVIDKRLVNSKECVIGTYRAAAAKSKRFQFKLVPNYFVSTADAKR   | 134 |

[illegible]

|                     |                                                                              |     |
|---------------------|------------------------------------------------------------------------------|-----|
| <i>TVCV OSU</i>     | FKAVDNF <b>RRKKKK</b> VEERDVV-SKYKYRPEKYAGPDSFNLKEENVLQHYKPESVPVLRSGVGRAHTNA | 267 |
| <i>NZ-587</i>       | FKAVDNF <b>RRKKKK</b> VEEKGVV-SKYKYRPEKYAGPNSFNFKEENVLQHYEPESVPVFRSGVGRAHTNA | 267 |
| <i>NZ-438</i>       | FKAVDNF <b>RRKKKK</b> VEEKGVV-RKYKYRPEKYAGPNSFNLKEENVLQDYEPESVPVFRSGVGRAHTNA | 267 |
| <i>Pet-MS</i>       | FKAVDNF <b>RRKKKK</b> VEERDVV-SKYKYRPEKYAGPDSFNLKEENALQHYKPESVPVLRSGVGRAHTNA | 267 |
| <i>D/A</i>          | FKAVDNF <b>RRKKKK</b> VEEKGVV-SKYKYRPEKYAGPDSFNLKEENVLQHYKPESVPVFRSGVGRAHSDA | 267 |
| <i>YoMV (ORMV)</i>  | FKAIDSF <b>RRKKKR</b> IGGRDVNSNKYRYRPERYAGPDSLQYKEENGLQHHELESVPVFRSDVGRAHSDA | 265 |
| <i>Shanxi</i>       | SKAIDSF <b>RRKKKR</b> IGGKDVNNKKYRYRPERYAGPNSLQYKEGNDLQHHELESVPVFRSDVGRAHGD  | 265 |
| <i>Br</i>           | FKAIDSF <b>RRKKKK</b> IGGKDVNNKKYRYRPERYAGPDSLQYKEENVLQHHELESVPVFRSDVGRAHSDA | 265 |
| <i>R/W</i>          | FKAIDSF <b>RRKKKK</b> IGGKDVNNKKYRYRPERYAGPDSLQYKEENGLQHHELESVPVFRSDVGRAHSDA | 265 |
| <i>Shanghai</i>     | FKAIDSF <b>RRKKKK</b> IGGRDVN-NKYRYRPERYAGPDSLQYKEENGLQHHELESVPVFRSDVGRAHSDA | 264 |
| <i>722</i>          | FKAVDTF <b>RRKKKK</b> IGGKDVNNKKYRYRPERYAGDSLQYKEENVLQHHELESVPVFRSDVGRAHSDA  | 265 |
| <i>Wh</i>           | FKAIDSF <b>RRKKKK</b> IGGKDVSNKKYRYRPETYAGPDSLQYKEGNVLQHHELESVPVFRSNVGRAHSDA | 265 |
| <i>RMV (Zhu/Yu)</i> | FKAIDSF <b>RRKKKK</b> IGGRDVNNKKYRYRPERYAGPDSLQYKEENGLQHHELESVPVFRSDVGRAHSDA | 265 |
| <i>Kons.1105</i>    | FRAVDNF <b>RRKKKR</b> IGEKEAV-SRNKYRPEKHAGPNSLYIKEENVLQHHELESVPVLRSGVGRTHNA  | 267 |
| <i>Act.-AC/AD</i>   | FKAVDNF <b>RRKKKR</b> IGGSEVV-SKNKYRPEKHAGPNSLYIKEENVLQHHELESVPVFRSGVGRAHTNA | 267 |
| <i>FSHS</i>         | FKAVDNF <b>RRKKKR</b> IGEKEVV-SRNKYRPEKHAGPNSLYIKEENVLQHHELESVPVLRSGVGRTYTNA | 267 |
| <i>NZ-439</i>       | FKAVDNF <b>RRKKKR</b> IGEKEVV-SRNKYRPEKHAGPNSLYIKEENVLQHHELESVPVLRSGVGRTHNA  | 267 |
|                     | * * * * *                                                                    |     |

**Figure S1. Conservation of MP<sup>TVCV</sup> NLS among all subgroup 3 Tobamoviruses**

Alignment of all sequenced MP proteins from the subgroup 3 Tobamoviruses (TVCV, YoMV and RMV). Conservation of monopartite NLS identified in TVCV in this study (TVCV OSU, top line) as predicted among all available subgroup 3 virus MP sequences is highlighted in yellow (basic residues) with additional residues predicted to be involved in importin- $\alpha$  interactions ([http://nls-mapper.iab.keio.ac.jp/cgi-bin/NLS\\_Mapper\\_form.cgi/](http://nls-mapper.iab.keio.ac.jp/cgi-bin/NLS_Mapper_form.cgi/)) shaded in grey. Accession numbers for each MP sequence is shown at the right of the first line of sequence, as are the residue positions within each protein (every line). Sequence similarity indicated below the aligned sequences. See text for details.

|                |                                                                      |     |        |
|----------------|----------------------------------------------------------------------|-----|--------|
| TMGMV (TMV U2) | MAVSLRDTVKISEFINLSKQDEILPAFMTKVKSVRISTVDKIMAVKNDLSLSDVDLLKGVKLVKNGYV | 67  | P18338 |
| U2             | MAVSLRDTVKISEFIDLSKQDEILPAFMTKVKSVRISTVDKIMAVKNDLSLSDVDLLKGVKLVKNGYV | 67  | A4LAL8 |
| Japanese       | MAVSLRDTVKISEFIDLSKQDEILPAFMTKVKSVRISTVDKIMAVKNDLSLSDVDLLKGVKLVKNGYV | 67  | Q8V701 |
| HP             | MAVSLRDTVKISEFIDLSKQDEILPAFMTKVKSVRISTVDKIMAVKNDLSLSDVDLLKGVKLVKNGYV | 67  | A3QVG8 |
|                | *****;*****                                                          |     |        |
| TMGMV (TMV U2) | CLAGLVVSGEWNLPDNCRGGVSVCIVDKRMKRSNEATLGAYHAPACKKNFSFKLIPNYSITSEDAEK  | 134 |        |
| U2             | CLAGLVVSGEWNLPDNCRGGVSVCIVDKRMKRSKEATLGAYHAPACKKNFSFKLIPNYSITSEDAEK  | 134 |        |
| Japanese       | CLAGLVVSGEWNLPDNCRGGVSVCIVDKRMKRSKEATLGAYHAPACKKNFSFKLIPNYSITSEDAEK  | 134 |        |
| HP             | CLAGLVVSGEWNLPDNCRGGVSVCIVDKRMKRSKEATLGAYHAPACKKNFSFKLIPNYSITSEDAEK  | 134 |        |
|                | *****;*****                                                          |     |        |
| TMGMV (TMV U2) | NPWQVLVNIKGVAMEEGYCPLSLEFVSICVVHKNNVRKGLRERILRVTDGSPIELTEKVVEEFVDEV  | 201 |        |
| U2             | HPWQVLVNIKGVAMEEGYCPLSLEFVSICVVHKNNVRKGLRERILSVTDGSPIELTEKVVEEFVDEV  | 201 |        |
| Japanese       | HPWQVLVNIKGVAMEEGYCPLSLEFVSICVVHKNNVRKGLRERILRVTDGLPIELTEKVVEEFVDEV  | 201 |        |
| HP             | HPWQVLVNIKGVAMEEGYCPLSLEFVSICVVHKNNVRKGLRERILRVTDGLLIELTEKVVEEFVDEV  | 201 |        |
|                | *****;*****                                                          |     |        |
| TMGMV (TMV U2) | PMAVKLERFRKTKKGGKKRKKKKRVVGNVNNKKINNSGKKGLKVEEIEDNVSDDESIIASSSTF     | 266 |        |
| U2             | PMAVKLERFRKTK-----KKVVGNNVNNKKINNSGKKGFKIEEIEDNVSDDESIIASSSTF        | 256 |        |
| Japanese       | PMAVKLERFRKTK-----KRVVGNVNNKKINNSGKKGLKVEEIEDSVSDDESIIASSSTF         | 256 |        |
| HP             | PMAVKLERFRKTK-----KRVVGNVNNKKINNSGKKGLKVEEIEDSVSDDESIIASSSTF         | 256 |        |
|                | *****;*****;*****;*****;*****;*****                                  |     |        |

**Figure S2. A putative basic monopartite NLS is not conserved among TMGMV isolates.** Alignment of MP protein sequences from the four sequenced isolates of *Tobacco mild green mosaic virus* (TMGMV). The monopartite NLS predicted to be present in one isolate, and to correspond in sequence and position to the MP<sup>TVCV</sup> NLS, is highlighted in yellow with additional residues predicted to be involved in importin- $\alpha$  interactions ([http://nls-mapper.iab.keio.ac.jp/cgi-bin/NLS\\_Mapper\\_form.cgi/](http://nls-mapper.iab.keio.ac.jp/cgi-bin/NLS_Mapper_form.cgi/)) shaded in grey. Accession numbers for each MP sequence are shown at the right of the first line of sequence, as are the residue positions within each protein (every line). Sequence similarity indicated below the aligned sequences. See text for details.
